# Supplementary material
Source: Springer Nature journal article supplement (https://www.springermedizin.de/resource/supplementary/12889_2005_271_MOESM1_ESM.pdf/9500500)

## Males

## Females

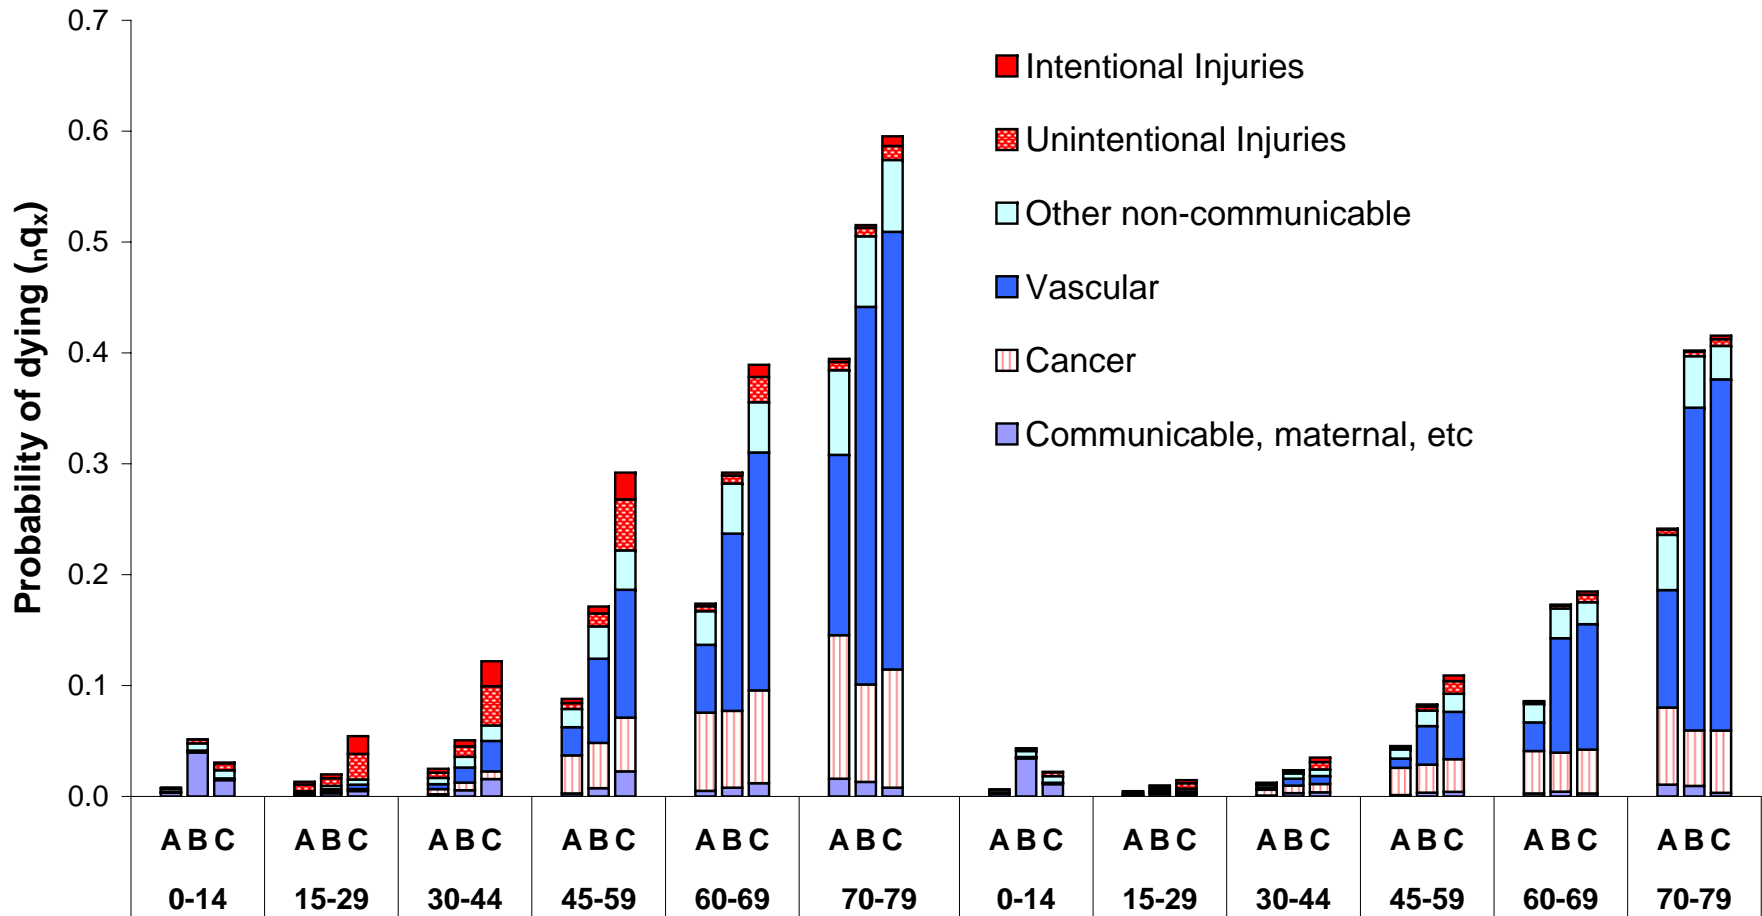

Supplement: MOESM1 [file 9500500]
